# Supplementary material
Source: ML conference proceedings conference paper supplement (https://proceedings.mlr.press/v119/chauhan20a.html)
Supplement: Supplementary file 1 [file chauhan20a-supp.pdf]

## Supplementary Material

Source code: [https://github.com/lakshaykc/lfm\\_quant](https://github.com/lakshaykc/lfm_quant)
